# Supplementary material
Source: publisher site journal article supplement (https://www.spandidos-publications.com/6121/downloadSupplementary)
Supplement: Supplementary file 1 [file downloadSupplementary]

## Sheet: Supplementary Table S1
Table SI. 467 upregulated genes.
No.	Gene symbol	logFC	AveExpr	t	P-Value	B
1	CCL21	1.14532	5.10781	5.13304	0.000266556	-3.85562
2	LOC100506745	1.59347	6.13541	4.96802	0.000349481	-3.87384
3	POM121L6P	1.71569	6.99899	4.66134	0.000583947	-3.91041
4	CLPSL1	1.09719	4.86825	4.43196	0.00086437	-3.94024
5	MIR3935	1.95393	6.61416	4.36744	0.000966361	-3.94903
6	OR2L1P	1.91215	6.63072	4.32127	0.00104698	-3.95543
7	RN5S201	1.29554	7.05182	4.2016	0.00129024	-3.97247
8	CTF1	1.01372	5.83013	4.05645	0.00166606	-3.99399
9	RN5S332	1.62533	4.39885	4.04878	0.00168884	-3.99516
10	MIR329-1	1.77934	3.87539	4.0312	0.00174226	-3.99784
11	HSD17B1P1	1.01086	4.35094	3.96179	0.0019708	-4.00856
12	DKFZP434H168	1.09396	4.69914	3.95097	0.00200914	-4.01025
13	SNORD114-17	1.68642	4.36236	3.79099	0.00267487	-4.0359
14	TCEB3C	1.10443	5.97837	3.78104	0.00272313	-4.03754
15	TCEB3CL	1.10443	5.97837	3.78104	0.00272313	-4.03754
16	SNORD23	1.77063	5.83327	3.77872	0.00273449	-4.03792
17	IGLV2-14	1.06571	8.76498	3.64356	0.00348946	-4.06063
18	MIR4324	1.99259	6.7675	3.57847	0.00392635	-4.07188
19	TRBV4-2	2.0062	4.92209	3.56476	0.00402527	-4.07427
20	TRBV4-3	2.0062	4.92209	3.56476	0.00402527	-4.07427
21	MIR4492	1.2323	7.23441	3.53888	0.00421911	-4.07882
22	LOC400927	1.67815	6.50588	3.51727	0.00438818	-4.08264
23	LOC439994	1.75747	5.72307	3.51346	0.00441872	-4.08332
24	TISP43	1.51521	7.53541	3.51115	0.00443728	-4.08373
25	IGHV1-12	1.60983	4.77088	3.46873	0.00479364	-4.09131
26	LOC100652818	1.60983	4.77088	3.46873	0.00479364	-4.09131
27	FTHL17	1.23782	4.20595	3.43531	0.00509493	-4.09734
28	TRIM74	1.36659	5.41498	3.42845	0.00515905	-4.09858
29	MIR891A	1.65401	5.79915	3.41461	0.00529111	-4.1011
30	RN5S427	2.48991	4.68324	3.40063	0.00542787	-4.10365
31	RN5S515	2.92946	5.52045	3.40042	0.00542999	-4.10369
32	RN5S521	1.47752	4.21429	3.38034	0.00563297	-4.10738
33	RN5S522	1.47752	4.21429	3.38034	0.00563297	-4.10738
34	TRAJ39	2.98748	4.88129	3.37801	0.005657	-4.10781
35	IGLV10-54	1.32743	5.71428	3.3701	0.00573936	-4.10926
36	KIR3DL3	1.0597	5.05668	3.35981	0.00584839	-4.11116
37	MIR1538	1.53422	6.49934	3.35693	0.00587932	-4.1117
38	CDRT15	1.28653	6.60054	3.35614	0.00588776	-4.11184
39	RN5S258	1.0573	4.4861	3.35187	0.005934	-4.11263
40	SNAR-I	2.03207	6.38446	3.34813	0.00597472	-4.11333
41	LOC100128023	1.24928	3.74316	3.3472	0.00598483	-4.1135
42	GRP	1.0136	5.86994	3.30336	0.00648501	-4.12168
43	FAM90A27P	1.77681	6.33958	3.30304	0.00648876	-4.12173
44	LRRC3C	1.75151	5.35261	3.28838	0.00666548	-4.12449
45	LOC100288160	1.15015	6.17273	3.27731	0.00680203	-4.12658
46	RN5S285	1.76667	3.61431	3.27624	0.00681545	-4.12678
47	MIR4293	1.66003	4.47891	3.26757	0.00692455	-4.12842
48	SBDSP1	1.07853	4.81982	3.25044	0.0071455	-4.13167
49	RN5S62	1.09988	3.5363	3.24581	0.00720651	-4.13255
50	MIR1301	1.63884	6.28921	3.24569	0.00720812	-4.13257
51	RN5S453	1.74182	6.93848	3.23712	0.00732233	-4.1342
52	NPTX2	1.09688	5.27345	3.22636	0.00746822	-4.13626
53	MIR1280	1.7868	6.11955	3.21107	0.00768085	-4.13919
54	CT47A1	1.47843	5.36115	3.20904	0.00770951	-4.13958
55	CT47A6	1.47843	5.36115	3.20904	0.00770951	-4.13958
56	CT47A12	1.47843	5.36115	3.20904	0.00770951	-4.13958
57	CT47A2	1.47843	5.36115	3.20904	0.00770951	-4.13958
58	CT47A3	1.47843	5.36115	3.20904	0.00770951	-4.13958
59	CT47A4	1.47843	5.36115	3.20904	0.00770951	-4.13958
60	CT47A5	1.47843	5.36115	3.20904	0.00770951	-4.13958
61	CT47A8	1.47843	5.36115	3.20904	0.00770951	-4.13958
62	CT47A9	1.47843	5.36115	3.20904	0.00770951	-4.13958
63	CT47A10	1.47843	5.36115	3.20904	0.00770951	-4.13958
64	CT47A7	1.47843	5.36115	3.20904	0.00770951	-4.13958
65	CT47A11	1.47843	5.36115	3.20904	0.00770951	-4.13958
66	RN5S68	1.04197	5.48407	3.20545	0.00776047	-4.14026
67	IGHV6-1	1.1233	5.19176	3.20498	0.00776714	-4.14035
68	RN5S204	1.3423	5.9423	3.19182	0.00795713	-4.14289
69	FLJ43763	1.02039	4.51998	3.19111	0.00796752	-4.14302
70	RN5S132	1.67519	9.29233	3.1808	0.00811975	-4.14501
71	GATA1	1.26205	5.81474	3.16822	0.00830953	-4.14745
72	IGKV2-29	1.0985	4.01157	3.16284	0.00839214	-4.14849
73	LOC100240734	1.60422	5.0051	3.16065	0.00842599	-4.14892
74	MIR4756	1.17912	5.96224	3.15305	0.00854437	-4.1504
75	RPL29P2	1.04692	6.43162	3.15108	0.00857535	-4.15078
76	FLJ35934	1.14699	6.25901	3.14093	0.00873689	-4.15276
77	CRTC1	1.07367	5.67255	3.13343	0.00885801	-4.15422
78	RNU4-7P	1.72939	3.56206	3.12766	0.00895255	-4.15535
79	IGLL3P	1.6603	5.07788	3.11349	0.00918876	-4.15813
80	MIR302D	1.80607	2.99699	3.10871	0.00926981	-4.15907
81	LOC100507548	1.12282	5.29555	3.10163	0.00939134	-4.16046
82	TRBJ2-1	1.72015	5.4806	3.10128	0.00939735	-4.16053
83	SNURFL	1.06207	4.80009	3.0944	0.00951704	-4.16188
84	C1orf145	1.02664	4.70463	3.09013	0.0095919	-4.16273
85	RN5S455	1.27426	3.48372	3.08857	0.00961956	-4.16303
86	DUXA	1.42964	4.38845	3.08814	0.00962721	-4.16312
87	POU5F1P4	2.17035	6.25618	3.06917	0.00996898	-4.16687
88	LOC100505529	1.19041	3.71143	3.06229	0.0100959	-4.16824
89	MIR4731	1.45102	4.43816	3.06163	0.0101081	-4.16837
90	MIR3972	1.58769	4.40382	3.05634	0.0102069	-4.16942
91	RN7SKP3	1.46052	2.76723	3.05017	0.0103233	-4.17065
92	RN5S440	1.84314	6.13956	3.04955	0.0103353	-4.17077
93	SFTPD	1.18507	5.28908	3.04471	0.0104276	-4.17174
94	SNAR-D	1.81496	6.86867	3.04188	0.010482	-4.1723
95	OR2A25	1.18666	2.88709	3.03974	0.0105235	-4.17273
96	CGB1	1.85358	5.49523	3.03868	0.010544	-4.17294
97	FLJ44313	1.09823	4.98019	3.03844	0.0105486	-4.17299
98	LOC100129027	1.73551	5.84031	3.03071	0.0106995	-4.17453
99	DTX2P1-UPK3BP1-PMS2P11	1.09712	5.16216	3.02253	0.0108619	-4.17617
100	TRBV6-1	1.30156	5.19807	3.01755	0.0109618	-4.17717
101	SYT5	1.03904	6.88248	3.00649	0.011187	-4.17939
102	MIR593	1.41613	6.93131	2.9962	0.0114009	-4.18146
103	MIR1183	1.49273	2.72123	2.97581	0.0118367	-4.18558
104	TRAJ13	1.05432	2.93702	2.97393	0.0118779	-4.18596
105	RN5S342	1.00541	2.6494	2.97353	0.0118865	-4.18604
106	RN5S253	1.00541	2.6494	2.97353	0.0118865	-4.18604
107	RN5S254	1.00541	2.6494	2.97353	0.0118865	-4.18604
108	LOC284276	1.55124	4.78611	2.96915	0.0119826	-4.18693
109	MIR4516	1.72257	6.10811	2.96912	0.0119832	-4.18693
110	MIR342	1.26888	6.15959	2.95977	0.0121913	-4.18883
111	FRMD8P1	1.23952	5.30383	2.95099	0.0123897	-4.19061
112	GLYCTK-AS1	1.29386	4.88432	2.95039	0.0124034	-4.19074
113	GABRR2	1.41269	5.73958	2.94774	0.0124642	-4.19128
114	LOC400682	1.48571	6.03233	2.94589	0.0125065	-4.19165
115	TRAJ59	2.89663	3.69663	2.93838	0.0126806	-4.19318
116	MIR330	1.70799	5.59514	2.934	0.0127831	-4.19408
117	RPL3L	1.09989	5.61495	2.93267	0.0128145	-4.19435
118	SNORA71C	1.01412	6.28587	2.93181	0.0128348	-4.19452
119	NTM-IT3	1.21943	4.63527	2.93018	0.0128732	-4.19486
120	ATP2B2	1.00856	4.85576	2.92713	0.0129458	-4.19548
121	BARHL2	1.23348	4.44848	2.92624	0.0129671	-4.19566
122	RN5S69	1.65059	4.71307	2.92554	0.0129836	-4.19581
123	MIR151B	1.44596	6.2422	2.92493	0.0129982	-4.19593
124	SNAR-G1	1.05327	6.34614	2.92303	0.0130439	-4.19632
125	OPTC	1.14434	4.94817	2.91176	0.013317	-4.19863
126	CECR9	1.99388	5.09214	2.91169	0.0133187	-4.19864
127	TRAV38-2DV8	1.60801	5.82282	2.91039	0.0133507	-4.19891
128	MIR1226	1.48971	5.02621	2.90427	0.0135018	-4.20016
129	SOX10	1.21023	4.94946	2.90422	0.0135029	-4.20017
130	MIR3918	1.30499	3.70878	2.90372	0.0135155	-4.20028
131	LGALS9C	1.04008	5.98628	2.90364	0.0135175	-4.20029
132	LOC100509686	1.72662	4.96275	2.90226	0.0135519	-4.20058
133	AZI1	1.1952	5.70211	2.90222	0.0135528	-4.20059
134	LOC100287098	1.3189	5.85328	2.89537	0.0137246	-4.20199
135	LEUTX	1.67625	5.59235	2.89486	0.0137374	-4.2021
136	RN5S93	1.85846	5.35104	2.88426	0.0140081	-4.20428
137	CGB8	1.94372	5.91561	2.88304	0.0140395	-4.20453
138	CGB5	1.94372	5.91561	2.88304	0.0140395	-4.20453
139	CGB	1.94372	5.91561	2.88304	0.0140395	-4.20453
140	RN5S158	1.333	4.03043	2.88055	0.0141038	-4.20505
141	SNAR-F	1.36343	5.99708	2.87904	0.0141431	-4.20536
142	RASGEF1C	1.09454	5.43261	2.87742	0.0141852	-4.20569
143	LOC100507013	1.68541	4.86474	2.87523	0.0142426	-4.20615
144	MYLPF	1.21741	6.18771	2.87266	0.0143101	-4.20668
145	IGLJ4	1.6585	6.28862	2.87201	0.014327	-4.20681
146	LINC00566	1.68864	6.44845	2.87084	0.014358	-4.20705
147	TTC34	1.05659	5.37607	2.87009	0.0143779	-4.20721
148	LOC284630	1.05659	5.37607	2.87009	0.0143779	-4.20721
149	MIR4730	1.46184	4.76267	2.86845	0.0144213	-4.20755
150	LOC100509247	1.78555	5.69375	2.86832	0.0144248	-4.20757
151	SAPCD1-AS1	1.14279	5.81717	2.86092	0.0146222	-4.2091
152	RN5S413	1.69142	5.78678	2.85989	0.01465	-4.20932
153	MIR4682	1.43925	4.88561	2.85715	0.0147241	-4.20989
154	C14orf144	1.04308	5.43396	2.85041	0.0149076	-4.21128
155	SPRR2A	1.37322	8.31315	2.85003	0.0149182	-4.21136
156	ANKK1	1.14538	5.06679	2.84039	0.0151848	-4.21337
157	GLIS3-AS1	1.22161	5.24224	2.83884	0.0152281	-4.21369
158	LOC643441	1.26225	4.20563	2.82967	0.0154869	-4.2156
159	MIR500B	1.42344	4.84064	2.82546	0.0156074	-4.21648
160	MIR3978	1.56827	5.82358	2.82155	0.0157199	-4.21729
161	MIR3922	1.15538	4.34061	2.82033	0.015755	-4.21754
162	LOC100506219	1.45951	5.64265	2.81932	0.0157844	-4.21776
163	C11orf91	1.20629	5.46817	2.8173	0.015843	-4.21818
164	MIR4533	1.3055	6.84111	2.8116	0.0160101	-4.21937
165	LOC100192204	1.80127	5.39028	2.81024	0.0160499	-4.21965
166	ARID3A	1.26688	6.45868	2.80571	0.0161841	-4.2206
167	DDX11-AS1	1.26648	4.65893	2.80432	0.0162257	-4.22089
168	TEKT4	1.13544	6.63497	2.80418	0.0162296	-4.22092
169	CYP2A7	1.6151	5.92555	2.80178	0.0163013	-4.22142
170	MIR4468	1.25891	4.43091	2.78968	0.0166679	-4.22396
171	SYT8	1.03473	4.77276	2.78882	0.0166943	-4.22414
172	IGLJ7	1.94073	7.725	2.78448	0.0168278	-4.22505
173	MIR3907	1.86602	7.5376	2.78152	0.0169195	-4.22567
174	SNAR-G2	1.58051	7.07366	2.77954	0.0169811	-4.22609
175	FAM22F	1.07197	4.61768	2.77952	0.016982	-4.2261
176	MIR4646	1.75117	3.47311	2.77783	0.0170348	-4.22645
177	MIR324	1.62633	5.1143	2.77687	0.0170648	-4.22665
178	TRDJ2	1.14466	2.91752	2.77277	0.0171938	-4.22752
179	MIR4289	1.44195	4.68885	2.77198	0.0172187	-4.22768
180	MIR218-1	1.91932	4.91529	2.76621	0.0174022	-4.2289
181	RN5S60	1.34474	6.1398	2.76489	0.0174443	-4.22918
182	QRFP	1.51301	5.71085	2.76034	0.0175907	-4.23014
183	RNU1-13P	3.02378	4.59408	2.75791	0.0176692	-4.23065
184	RNU1-12P	3.02378	4.59408	2.75791	0.0176692	-4.23065
185	FABP9	1.35598	3.10022	2.7565	0.0177151	-4.23095
186	HOXB-AS4	1.64022	5.14684	2.75075	0.0179032	-4.23216
187	OR10D3	1.25947	4.35148	2.74551	0.0180761	-4.23327
188	C16orf74	1.51165	5.55734	2.74315	0.0181545	-4.23377
189	DEGS2	1.32376	5.92816	2.74152	0.0182088	-4.23411
190	KCNF1	1.15946	5.76302	2.73363	0.0184746	-4.23578
191	MIR3065	1.38705	5.12822	2.72941	0.018618	-4.23668
192	MYL5	1.08093	5.15524	2.72824	0.0186583	-4.23693
193	TRAJ46	2.15811	4.8709	2.72637	0.0187224	-4.23732
194	PNMA3	1.00715	5.32518	2.72108	0.018905	-4.23845
195	RN5S461	1.3218	6.60643	2.721	0.0189077	-4.23846
196	RN5S406	1.16509	4.71821	2.71245	0.0192066	-4.24028
197	RN5S52	1.33618	3.24992	2.70255	0.0195585	-4.24239
198	OR2A1	1.37177	5.40151	2.7023	0.0195674	-4.24244
199	OR2A42	1.37177	5.40151	2.7023	0.0195674	-4.24244
200	RN5S110	1.56065	3.76689	2.7021	0.0195746	-4.24249
201	C20orf166-AS1	1.30045	5.22357	2.70202	0.0195772	-4.2425
202	MIR4686	1.60348	5.35325	2.69243	0.0199247	-4.24455
203	RNF207	1.35835	5.45218	2.69162	0.0199543	-4.24472
204	SRGAP2B	1.04379	6.05127	2.68932	0.0200387	-4.24521
205	LOC100505630	1.04379	6.05127	2.68932	0.0200387	-4.24521
206	WNT4	1.20538	4.22898	2.6874	0.0201091	-4.24562
207	MEOX1	1.23227	5.66482	2.6869	0.0201274	-4.24573
208	SNORD42A	1.93841	3.77597	2.68067	0.0203587	-4.24706
209	MIR4681	1.83299	4.31361	2.6767	0.0205073	-4.24791
210	MIR3137	1.54434	5.06988	2.66545	0.0209343	-4.25032
211	MIR4421	1.67042	3.41692	2.66245	0.0210498	-4.25096
212	CGB2	1.09373	3.90323	2.66067	0.0211186	-4.25134
213	CD5L	1.2005	4.31484	2.66042	0.0211281	-4.2514
214	RNU6-65	1.61521	3.19607	2.65911	0.021179	-4.25168
215	C8orf87	1.38939	4.27508	2.65783	0.0212284	-4.25195
216	RN5S190	1.03285	6.01708	2.65556	0.0213169	-4.25244
217	IGFBP6	1.40879	5.84677	2.65548	0.02132	-4.25246
218	KIF26A	1.33045	5.31526	2.65127	0.0214851	-4.25336
219	C12orf68	1.06251	5.27484	2.65	0.0215353	-4.25363
220	KLK8	1.15128	5.64988	2.6479	0.0216179	-4.25408
221	TEX19	1.11976	4.54692	2.64749	0.0216344	-4.25417
222	FOXC2	1.21909	3.76957	2.64637	0.0216785	-4.25441
223	C9orf139	1.2019	4.74468	2.6433	0.021801	-4.25507
224	RGS14	1.00772	5.27078	2.64161	0.0218684	-4.25544
225	RN5S383	1.3822	4.21501	2.63835	0.0219993	-4.25614
226	IGHJ1	1.78418	5.77176	2.63825	0.0220035	-4.25616
227	MEGF10	1.03564	4.59427	2.63538	0.0221191	-4.25678
228	LOC727710	1.03557	5.06645	2.63272	0.0222271	-4.25735
229	IGLV3-16	1.59884	4.84297	2.63191	0.0222601	-4.25753
230	ZNF773	1.09078	4.6258	2.63022	0.0223289	-4.25789
231	MIR371B	1.61442	5.02244	2.62583	0.0225092	-4.25884
232	SLC6A8	1.25714	5.99879	2.62443	0.0225668	-4.25914
233	ABHD11-AS1	1.39648	5.32876	2.62105	0.0227067	-4.25987
234	RN5S409	2.04649	4.0616	2.62087	0.0227142	-4.25991
235	RN5S22	2.07967	3.53173	2.61779	0.0228427	-4.26057
236	CCDC48	1.16899	4.89435	2.61194	0.023088	-4.26183
237	MIR4638	1.2978	6.26846	2.61186	0.0230913	-4.26185
238	LOC84856	1.00096	5.06713	2.61159	0.0231027	-4.26191
239	MIR574	1.6735	7.7516	2.60824	0.0232447	-4.26263
240	MIR433	1.17347	5.65571	2.60518	0.0233752	-4.2633
241	LOC100132314	1.10122	3.61091	2.60496	0.0233845	-4.26334
242	COL6A2	1.17834	4.88501	2.60256	0.0234873	-4.26386
243	IGHV3-33	1.69515	5.22713	2.59823	0.023674	-4.2648
244	IGK@	1.05188	4.30752	2.59775	0.0236947	-4.2649
245	MIR3934	1.15779	4.05283	2.59278	0.0239111	-4.26598
246	FAM197Y1	1.25844	4.12575	2.59052	0.0240102	-4.26647
247	EHD2	1.35808	4.3051	2.58805	0.0241187	-4.26701
248	RNU6-71	1.19265	3.37189	2.58732	0.0241506	-4.26716
249	ARHGEF5	1.1696	4.36547	2.58643	0.0241901	-4.26736
250	MIR107	1.47225	4.7479	2.58534	0.0242381	-4.26759
251	SNAR-E	1.19624	9.17178	2.58524	0.0242425	-4.26762
252	IGKV1D-16	1.30507	7.06752	2.58424	0.0242868	-4.26783
253	NKPD1	1.12131	4.66769	2.58296	0.0243438	-4.26811
254	EDC4	1.17065	6.85041	2.58235	0.0243711	-4.26824
255	SAMD10	1.23257	5.73317	2.58137	0.0244146	-4.26846
256	TUBA8	1.07861	5.17433	2.57894	0.024523	-4.26898
257	OXER1	1.19374	5.11227	2.5778	0.0245742	-4.26923
258	S100A16	1.04842	4.99379	2.57716	0.0246032	-4.26937
259	MT4	1.32478	6.01132	2.57661	0.0246279	-4.26949
260	POU5F1P3	1.66697	5.58638	2.57356	0.0247653	-4.27015
261	FAM22G	1.15102	5.51015	2.5724	0.0248177	-4.2704
262	NTHL1	1.12525	5.03615	2.5598	0.0253952	-4.27314
263	MIR548Y	2.02196	3.81147	2.55599	0.0255725	-4.27398
264	ZNF524	1.28378	6.01756	2.5511	0.0258014	-4.27504
265	LOC100289079	1.08738	5.75691	2.54858	0.0259205	-4.27559
266	PLCL2	1.01975	4.94284	2.54571	0.0260561	-4.27621
267	MIR3714	1.01975	4.94284	2.54571	0.0260561	-4.27621
268	LOC286178	1.03681	4.04709	2.54497	0.0260915	-4.27638
269	OR52L1	1.00385	2.87874	2.54231	0.0262184	-4.27696
270	KRTAP10-6	1.53903	5.8346	2.54217	0.026225	-4.27699
271	RN5S469	1.59761	4.23204	2.53781	0.0264345	-4.27794
272	LOC100507378	1.09495	4.25726	2.53682	0.0264819	-4.27815
273	CPLX3	1.09978	5.49787	2.53624	0.02651	-4.27828
274	TRAJ54	1.46463	5.40408	2.53615	0.0265146	-4.2783
275	MIR551B	1.69753	4.83514	2.53586	0.0265282	-4.27836
276	CLDN3	1.35376	5.99599	2.53376	0.0266303	-4.27882
277	MIR4642	1.22007	4.76766	2.53308	0.0266632	-4.27897
278	MIR3619	1.63043	6.86966	2.5308	0.0267743	-4.27947
279	MIR1202	1.70178	6.90406	2.53059	0.0267843	-4.27952
280	RN5S122	2.50778	5.30882	2.52774	0.0269241	-4.28014
281	MIR3180-2	1.48649	7.4509	2.52679	0.0269705	-4.28035
282	MIR3180-1	1.48649	7.4509	2.52679	0.0269705	-4.28035
283	MIR3180-3	1.48649	7.4509	2.52679	0.0269705	-4.28035
284	NF1P2	1.09766	5.97813	2.52609	0.0270048	-4.2805
285	MT3	1.37976	5.0061	2.52218	0.0271978	-4.28135
286	LYPLA2	1.42784	5.07627	2.52156	0.0272288	-4.28149
287	MIR4748	1.53857	6.05219	2.52085	0.027264	-4.28165
288	LOC100129596	1.4416	6.17939	2.51942	0.027335	-4.28196
289	SIX3	1.01129	4.90679	2.51886	0.0273632	-4.28208
290	SNAR-B1	1.12158	8.572	2.51719	0.0274465	-4.28245
291	SNAR-B2	1.12158	8.572	2.51719	0.0274465	-4.28245
292	NTM-IT1	1.91077	5.3211	2.51621	0.0274953	-4.28266
293	LCE3B	1.1166	5.82847	2.51517	0.0275474	-4.28289
294	MIR4698	1.36949	4.78601	2.51117	0.0277489	-4.28377
295	MIS18A-AS1	1.25468	3.31406	2.50635	0.0279932	-4.28482
296	JSRP1	1.46181	5.88322	2.50492	0.0280664	-4.28513
297	LOC100129427	1.05249	5.05903	2.49838	0.0284026	-4.28657
298	RN5S256	1.41657	5.85801	2.49571	0.0285405	-4.28715
299	RN5S279	1.12082	3.80475	2.49568	0.0285422	-4.28716
300	RN5S423	1.96925	4.00094	2.49517	0.0285689	-4.28727
301	PCGEM1	1.09121	4.3137	2.49199	0.0287345	-4.28797
302	NOTCH3	1.14396	4.8316	2.48197	0.0292629	-4.29017
303	KRTAP10-10	1.46496	5.43895	2.48024	0.0293549	-4.29055
304	LOC643395	1.20254	5.39127	2.48011	0.0293619	-4.29058
305	CST2	1.50018	5.29627	2.47973	0.0293824	-4.29067
306	C20orf151	1.07664	5.60757	2.47929	0.0294055	-4.29076
307	KRTAP5-7	1.1174	7.38761	2.47768	0.0294918	-4.29112
308	RN5S386	1.82008	5.24788	2.47746	0.0295037	-4.29116
309	BGN	1.01138	5.03256	2.47704	0.0295265	-4.29126
310	RN5S85	2.30596	6.34523	2.47061	0.0298735	-4.29267
311	RN5S185	2.46639	4.03851	2.47004	0.0299043	-4.2928
312	MIR548H2	2.43546	6.25482	2.46906	0.0299578	-4.29301
313	MIR4663	1.69576	4.97011	2.46883	0.0299699	-4.29306
314	RN5S366	1.61004	4.13636	2.46858	0.0299835	-4.29312
315	C6orf223	1.21371	4.63575	2.46642	0.0301018	-4.2936
316	IGHJ3	2.00461	4.29481	2.46337	0.0302685	-4.29427
317	LOC100132249	1.11268	5.29363	2.46329	0.030273	-4.29428
318	LINC00615	1.05469	4.24066	2.46206	0.030341	-4.29456
319	COL5A3	1.06605	5.15394	2.46187	0.0303511	-4.2946
320	FAM99B	1.25071	5.96785	2.45992	0.0304589	-4.29503
321	LOC100505873	1.21154	5.37816	2.45853	0.0305361	-4.29533
322	ONECUT2	1.33707	5.55917	2.45645	0.0306516	-4.29579
323	IGH@	1.45922	5.00774	2.4557	0.0306931	-4.29596
324	FCN3	1.07462	5.01797	2.45081	0.0309671	-4.29704
325	SGK110	1.07302	4.95304	2.44987	0.0310198	-4.29724
326	MIR339	1.52214	6.99687	2.44557	0.0312629	-4.29819
327	PRR23B	1.03355	3.7149	2.44344	0.0313841	-4.29866
328	MIR4294	1.59194	5.49902	2.44288	0.0314156	-4.29879
329	TSR3	1.32536	6.03858	2.44148	0.0314957	-4.2991
330	RIN1	1.05807	5.37409	2.43738	0.0317308	-4.3
331	RN5S124	1.36282	3.38641	2.43718	0.0317422	-4.30005
332	OR51A4	2.20415	3.21998	2.43256	0.0320091	-4.30107
333	FLJ35390	1.23911	5.33818	2.43216	0.0320327	-4.30116
334	LOC284191	1.30024	5.72641	2.43096	0.0321021	-4.30142
335	RNU1-18P	2.21161	5.85894	2.42954	0.0321848	-4.30173
336	RNF224	1.24488	5.46013	2.429	0.0322167	-4.30185
337	SLC22A9	1.01194	4.14504	2.42343	0.0325433	-4.30309
338	LOC100287175	1.19808	5.15687	2.42126	0.0326718	-4.30357
339	MIR449A	1.00781	3.09966	2.41982	0.0327567	-4.30388
340	RN5S114	2.09578	4.68185	2.41952	0.0327749	-4.30395
341	MIR4786	1.23896	4.73897	2.41874	0.0328209	-4.30412
342	RN5S442	1.24697	4.10094	2.41618	0.0329735	-4.30469
343	FABP6	1.18066	4.22026	2.4159	0.0329906	-4.30475
344	DDX11L10	1.20453	6.32658	2.41111	0.0332776	-4.30581
345	RN5S293	1.3442	4.81326	2.40988	0.0333521	-4.30609
346	HTA	1.31708	5.29105	2.40778	0.033479	-4.30655
347	TRAJ24	1.40377	4.83157	2.40747	0.0334978	-4.30662
348	SNORD123	1.13609	4.82805	2.40573	0.0336034	-4.30701
349	SNORA38B	1.77945	7.24153	2.40268	0.0337893	-4.30768
350	LOC100133106	1.10144	3.99194	2.39994	0.0339574	-4.30829
351	WFDC1	1.13925	5.21543	2.39933	0.033995	-4.30843
352	CLEC11A	1.17182	5.8816	2.39857	0.034042	-4.30859
353	MIR1286	1.06619	4.86436	2.39659	0.0341639	-4.30903
354	LOC389607	1.23094	5.5752	2.39553	0.0342295	-4.30927
355	APOA5	1.15725	5.83993	2.39546	0.0342341	-4.30928
356	LOC100132999	1.04763	6.03732	2.39538	0.0342386	-4.3093
357	RNU6-72	1.21062	4.9037	2.38965	0.0345957	-4.31057
358	DDX12P	1.25899	5.4216	2.38416	0.0349405	-4.31179
359	KRT16P2	1.37394	6.59156	2.37987	0.0352124	-4.31275
360	RN5S295	1.09982	4.0217	2.37973	0.0352215	-4.31278
361	SOX9	1.2031	7.03628	2.3777	0.0353508	-4.31323
362	MIR4314	1.64796	5.36574	2.37745	0.0353665	-4.31328
363	MIR3666	1.39517	4.40559	2.37523	0.0355091	-4.31378
364	RRP7A	1.03049	4.79057	2.37148	0.0357503	-4.31461
365	IGKV1D-33	1.09483	5.71774	2.37083	0.0357919	-4.31475
366	IGKV1-33	1.09483	5.71774	2.37083	0.0357919	-4.31475
367	FAM25HP	1.10136	5.69976	2.36888	0.0359187	-4.31519
368	MIR106B	1.22928	5.34042	2.36707	0.0360359	-4.31559
369	MIR3150A	1.17284	5.89943	2.35761	0.036657	-4.3177
370	SNAR-C1	1.05669	8.44642	2.35621	0.0367495	-4.31801
371	SNAR-C2	1.05669	8.44642	2.35621	0.0367495	-4.31801
372	SNAR-C5	1.05669	8.44642	2.35621	0.0367495	-4.31801
373	SNAR-C3	1.05669	8.44642	2.35621	0.0367495	-4.31801
374	SNAR-C4	1.05669	8.44642	2.35621	0.0367495	-4.31801
375	GNRH2	1.38837	5.01169	2.35421	0.0368823	-4.31845
376	RGS16	1.01731	5.33324	2.34671	0.0373847	-4.32013
377	MESDC1	1.09189	5.32457	2.34431	0.0375468	-4.32066
378	RN5S428	2.1333	5.5064	2.34374	0.0375856	-4.32079
379	IGHEP1	1.4762	5.96583	2.33952	0.0378723	-4.32173
380	MIR3143	1.3687	6.97299	2.33855	0.0379384	-4.32194
381	TNFRSF18	1.02048	5.52398	2.33739	0.0380178	-4.3222
382	TRAJ8	1.20966	5.80779	2.33686	0.038054	-4.32232
383	T	1.03796	5.40463	2.33544	0.0381516	-4.32264
384	LOC100128818	1.17862	5.26523	2.33521	0.0381673	-4.32269
385	FAM78B	1.1731	5.06196	2.33458	0.0382108	-4.32283
386	BASP1P1	1.43626	5.64934	2.33381	0.0382642	-4.323
387	TRAJ10	1.44206	5.8347	2.329	0.0385969	-4.32408
388	RN5S51	1.02529	3.07128	2.32838	0.0386396	-4.32421
389	RARRES2	1.01324	5.24333	2.32471	0.0388959	-4.32503
390	TRAJ5	1.64717	4.42129	2.32328	0.0389967	-4.32535
391	LOC100506676	1.32917	6.17137	2.32292	0.0390218	-4.32543
392	SNORD88A	1.53281	6.32667	2.3202	0.0392129	-4.32604
393	HMGN2P42	1.54363	6.12606	2.31922	0.0392823	-4.32626
394	RN5S148	2.46345	4.69983	2.31409	0.0396468	-4.32741
395	OR7E47P	1.00538	5.90986	2.31332	0.0397017	-4.32758
396	LOC100509541	1.00538	5.90986	2.31332	0.0397017	-4.32758
397	CLDN23	1.16109	4.81115	2.31074	0.0398859	-4.32815
398	WNT9A	1.18125	5.35803	2.30847	0.0400496	-4.32866
399	RN5S450	1.48464	4.94668	2.30825	0.0400655	-4.32871
400	LOC100132966	1.23033	6.18683	2.30655	0.040188	-4.32909
401	MIR181C	1.22151	5.19726	2.30638	0.0401999	-4.32913
402	RN5S255	2.01949	5.76033	2.30621	0.0402126	-4.32917
403	LOC100134397	1.16168	5.66213	2.30546	0.0402666	-4.32933
404	PRAP1	1.23059	5.78393	2.30524	0.0402827	-4.32938
405	STMN3	1.14635	6.3145	2.30163	0.0405448	-4.33019
406	FAM90A10P	1.10277	5.47831	2.29866	0.0407616	-4.33085
407	LOC651337	1.111	5.97507	2.29582	0.04097	-4.33149
408	MIR941-1	1.25364	6.62547	2.29572	0.0409777	-4.33151
409	KCTD21	1.18033	5.69333	2.2939	0.0411115	-4.33192
410	C20orf90	1.21865	6.07701	2.29278	0.0411947	-4.33217
411	FAM90A25P	1.18961	5.571	2.29234	0.0412275	-4.33227
412	FAM90A15P	1.18961	5.571	2.29234	0.0412275	-4.33227
413	FAM90A13P	1.18961	5.571	2.29234	0.0412275	-4.33227
414	FAM90A14P	1.18961	5.571	2.29234	0.0412275	-4.33227
415	FAM90A3P	1.18961	5.571	2.29234	0.0412275	-4.33227
416	FAM90A4P	1.18961	5.571	2.29234	0.0412275	-4.33227
417	FAM90A5P	1.18961	5.571	2.29234	0.0412275	-4.33227
418	FAM90A23P	1.18961	5.571	2.29234	0.0412275	-4.33227
419	FAM90A18P	1.18961	5.571	2.29234	0.0412275	-4.33227
420	FAM90A16P	1.18961	5.571	2.29234	0.0412275	-4.33227
421	FAM90A8P	1.18961	5.571	2.29234	0.0412275	-4.33227
422	FAM90A17P	1.18961	5.571	2.29234	0.0412275	-4.33227
423	FAM90A19P	1.18961	5.571	2.29234	0.0412275	-4.33227
424	FAM90A9P	1.18961	5.571	2.29234	0.0412275	-4.33227
425	FAM90A6P	1.18961	5.571	2.29234	0.0412275	-4.33227
426	FAM90A22P	1.18961	5.571	2.29234	0.0412275	-4.33227
427	LINC00357	1.96819	5.18458	2.29208	0.0412465	-4.33233
428	RN5S141	1.61308	3.22629	2.29194	0.0412569	-4.33236
429	SNORA65	1.36672	5.17473	2.29134	0.041301	-4.33249
430	LOC100132705	1.39975	3.26486	2.2911	0.0413189	-4.33255
431	OSTM1-AS1	1.25974	4.46302	2.28798	0.0415514	-4.33324
432	LOC100130894	1.15595	4.90282	2.28538	0.0417459	-4.33383
433	TRAJ27	1.35736	5.42105	2.28476	0.0417921	-4.33396
434	SNORD88B	1.07648	5.60587	2.28468	0.0417984	-4.33398
435	OXT	1.09271	6.17101	2.28419	0.0418348	-4.33409
436	FAM90A7P	1.1564	5.49564	2.27949	0.0421891	-4.33515
437	FAM163B	1.32162	4.43959	2.27832	0.0422777	-4.33541
438	MIR520F	2.0651	4.59381	2.27783	0.042315	-4.33552
439	OR5C1	1.1758	5.78297	2.26826	0.0430472	-4.33766
440	DDX11L1	1.01269	5.65235	2.26352	0.0434142	-4.33872
441	DDX11L9	1.01269	5.65235	2.26352	0.0434142	-4.33872
442	LOC401010	1.01309	5.45736	2.26305	0.0434514	-4.33883
443	MIB2	1.09894	6.40848	2.2605	0.0436503	-4.3394
444	DEFB126	1.01679	3.94348	2.26049	0.0436505	-4.3394
445	GNG8	1.29813	5.86655	2.25974	0.0437094	-4.33957
446	RN5S473	2.24524	5.84111	2.25973	0.0437101	-4.33957
447	FAM90A24P	1.10908	5.3468	2.25827	0.043825	-4.3399
448	IGLV2-11	1.46559	6.81591	2.2576	0.0438771	-4.34005
449	MIR4673	1.63731	6.32134	2.25755	0.0438814	-4.34006
450	MIR500A	1.03542	4.18708	2.25462	0.0441119	-4.34072
451	HAMP	1.0906	6.35143	2.23755	0.0454804	-4.34455
452	TMEM88B	1.2312	6.55984	2.23569	0.0456316	-4.34497
453	FAM90A12P	1.07473	5.22871	2.23341	0.0458179	-4.34548
454	MIR708	1.2109	3.32393	2.23052	0.046055	-4.34613
455	FBLN7	1.01798	5.10324	2.2243	0.0465701	-4.34753
456	MIR4737	1.27206	7.74664	2.22269	0.0467041	-4.34789
457	LOC100287166	1.3295	5.20349	2.21999	0.0469295	-4.3485
458	MAP1LC3B2	1.51976	6.27501	2.21969	0.046955	-4.34856
459	MIR4746	1.33751	5.64654	2.21522	0.0473304	-4.34957
460	DNM1P46	1.15815	5.28439	2.2138	0.0474508	-4.34989
461	FLJ36116	1.01301	5.11217	2.21223	0.0475837	-4.35024
462	LOC100287633	1.01714	5.55609	2.21212	0.047593	-4.35026
463	FAM90A20P	1.01335	5.20775	2.21064	0.0477188	-4.3506
464	PRSS33	1.3303	5.49862	2.20819	0.047928	-4.35115
465	VAX2	1.24098	5.47062	2.20584	0.0481291	-4.35168
466	RN5S419	2.35605	5.33689	2.1999	0.0486415	-4.35301
467	RN5S447	1.09398	3.96612	2.18497	0.0499522	-4.35637
